# Supplementary material for: Quasi-2D MIL-100 (Fe) synthesis via benzene-1,3,5-tricarboxylic acid self-assembly: organic dye adsorption at room temperature with dramatically enhanced kinetics
Source: Royal Society of Chemistry journal article supplement (doi:10.1039/d4nr02857k), 2024-01-01
Supplement: d4nr02857k1.pdf [file d4nr02857k1.pdf]

## Supplementary Information

Quasi-2D MIL-100 (Fe) Synthesis via Benzene-1,3,5-Tricarboxylic Acid Self-Assembly: Organic Dye Adsorption at Room Temperature with Dramatically Enhanced Kinetics

*Ghazal Rabiee<sup>1</sup>, Alireza Abbasi<sup>1\*</sup>, Mohammad Behbahani<sup>2</sup>*

*<sup>1</sup>School of Chemistry, College of Science, University of Tehran, Tehran, Iran*

*<sup>2</sup>Department of Chemistry, Faculty of Science, Shahid Chamran University of Ahvaz, Ahvaz, Iran*

*\*E-mail: a\_abbasi@ut.ac.ir*

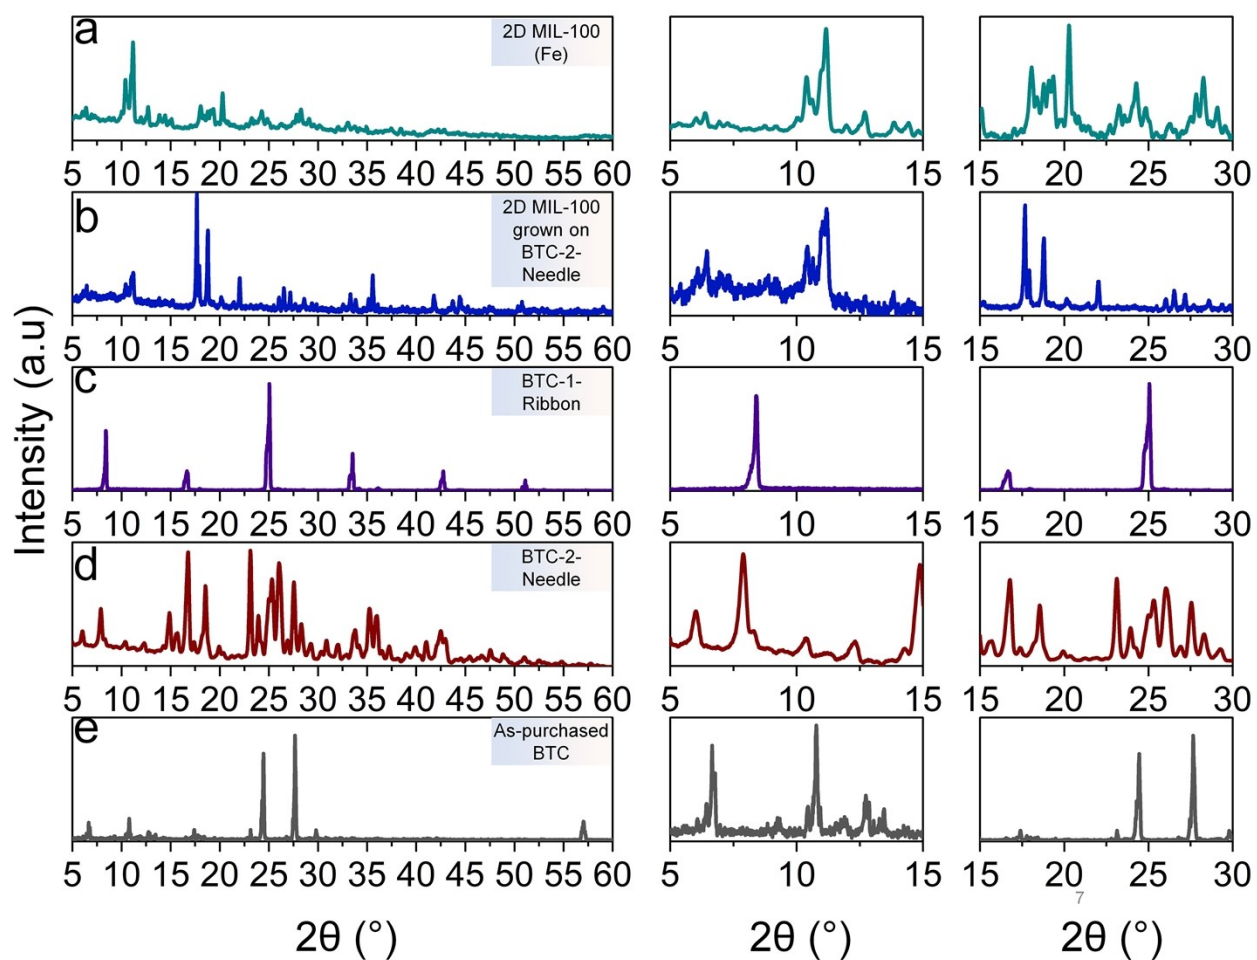

**Fig. S1.** X-ray diffraction analysis. (a) Patterns collected for quasi-2D MIL-100 (Fe) sample synthesized under optimized conditions and (b) patterns collected for needle-like structures presented in Fig. 1 in the main manuscript (grown on **BTC-2-Needle**). Here, the green labels show the matching diffractions between the two samples, and the red labels show extra unidentified diffraction, suggesting the formation of both the quasi-2D MIL-100 (Fe) phase and other secondary phases based on the interaction of BTC and Fe sources. Patterns collected for recrystallized BTC as (c) BTC-1-Ribbon, (d) BTC-2-Needle, and (e) as purchased BTC. The magnified portions of interest in each plot are shown on the right panels.

Fig. S1 displays the XRD patterns for the quasi-2D MIL-100 (Fe), Needle-like structures shown in Fig. 2, and XRD patterns of benzene-1,3,5-tricarboxylic acid (BTC) prepared through various crystallization processes. The principal objective of this analysis was to determine the source of contaminants in the needle-like structures and to investigate various assemblies of BTC molecules. XRD pattern for samples prepared under optimized conditions from BTC-1-Ribbon (Fig. S1 (a)) exhibits dominant peaks associated with MIL-100 (Fe) with no significantly detectable impurity peaks, consistent with the data in existing literature <sup>1-3</sup>. Fig. S1 (b) shows the XRD peaks of MIL-100 (Fe) particles ( $2\theta=5-15$ ) as well as noticeably sharp and unidentified peaks within  $2\theta=15^{\circ}-30^{\circ}$  and at the higher end of the  $2\theta$  scale. These peaks do not originate from starting materials and might stem from needle-like structures shown in Fig. 2 (main text). It is noteworthy to mention that the needle-like structures are not pure BTC-1-Needle anymore and have incorporated iron species in their structure and we do not expect to see the original BTC-1-Needle peaks in this sample. Fig. S1 (c) shows the XRD pattern for the self-assembled BTC molecules with a great degree of texture <sup>4</sup>. This texture, resulting from the highly aligned orientation of crystals within the polycrystalline sample, manifests in our XRD data as an unusually high signal-to-noise (S/N) ratio, which corroborates the formation of highly oriented ribbons. Fig. S1 (d and e) display the XRD pattern for the recrystallized BTC molecules in the form of needles (BTC-2-Needle) and the as-purchased BTC ligand.

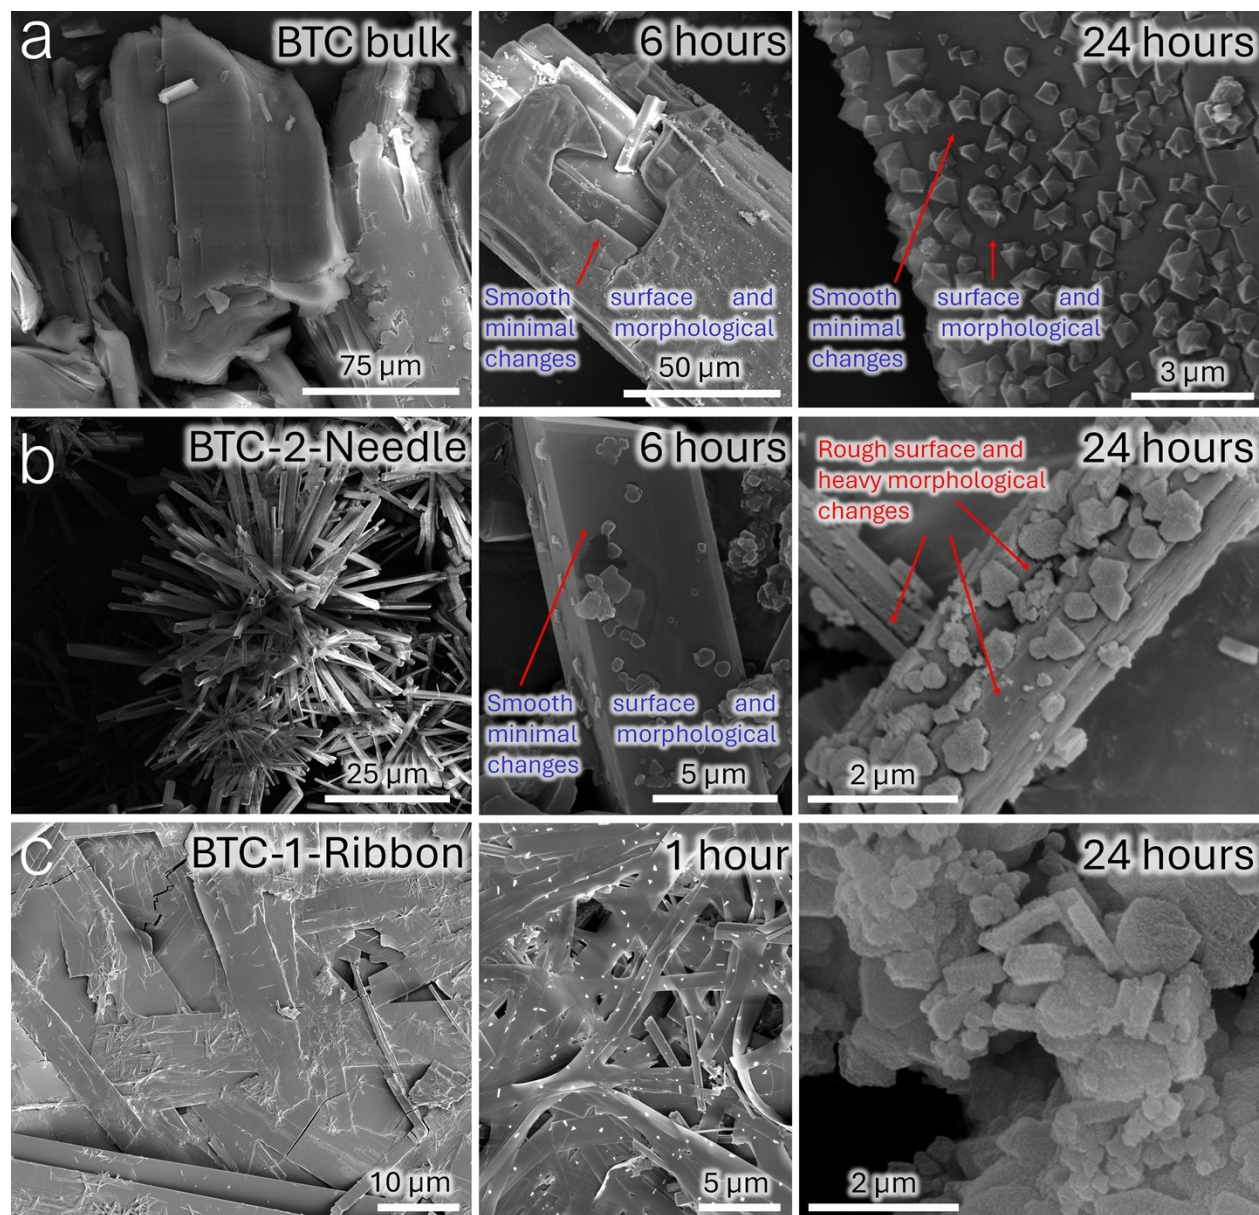

**Fig. S2.** Scanning electron microscopy analysis. (a) Bulk BTC before the synthesis, 6 and 24 hours into the synthesis. (b) BTC-2-Needle BTC before the synthesis, 6 and 24 hours into the synthesis. (c) BTC-1-Ribbon BTC before the synthesis, 1 and 24 hours into the synthesis.

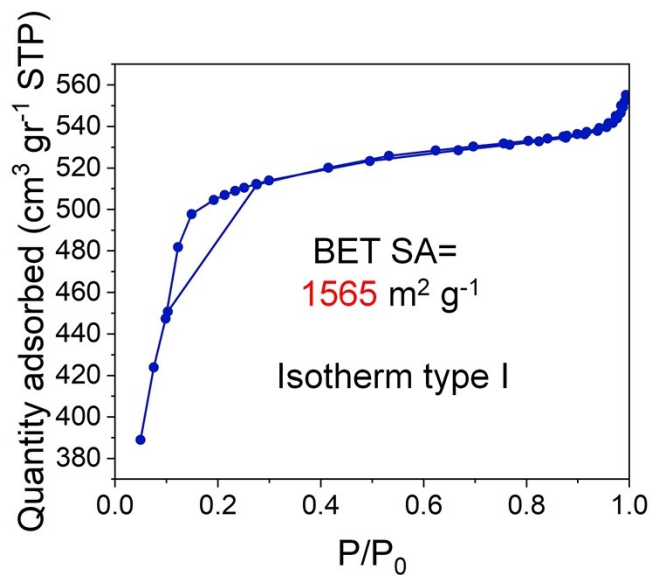

**Fig. S3.** The BET analysis of 3D MIL-100 (Fe) made via traditional synthesis route.

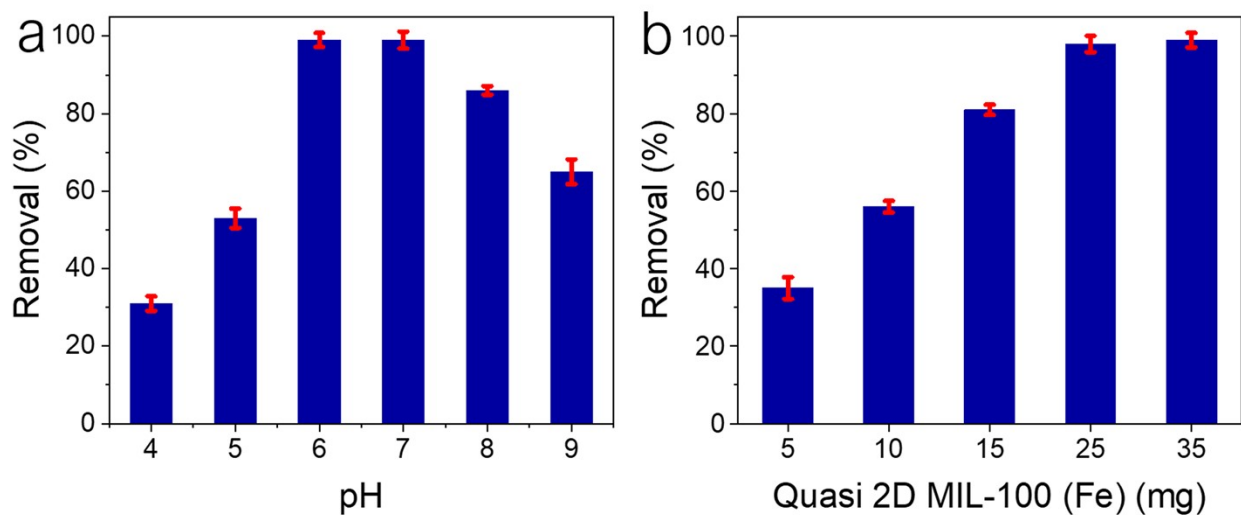

**Fig. S4.** The effect of (a) pH and (b) adsorbent mass on adsorption of RhB via quasi-2D MIL-100 (Fe).

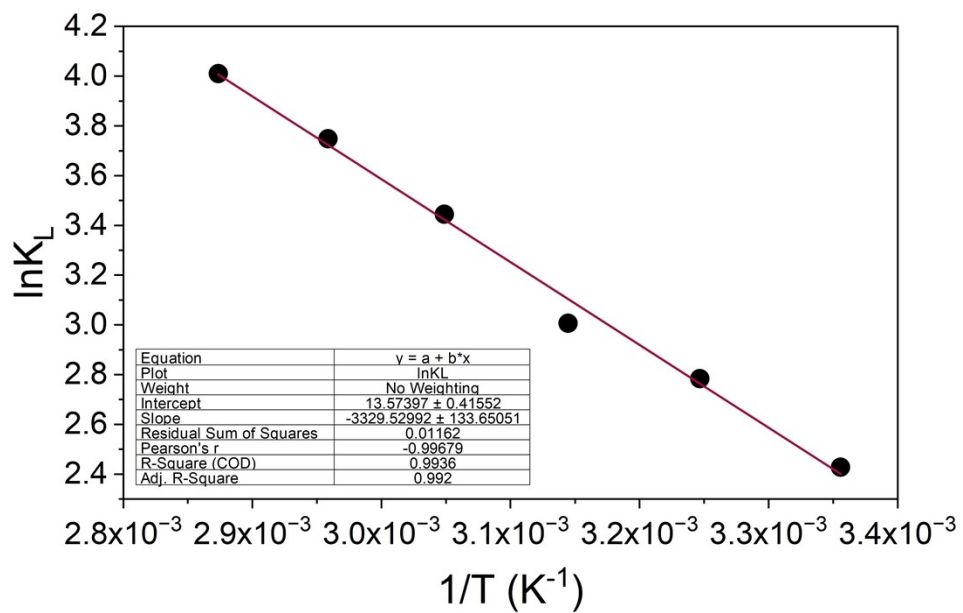

**Fig. S5.** Van't Hoff plot for the adsorption of RhB via quasi-2D MIL-100 (Fe).



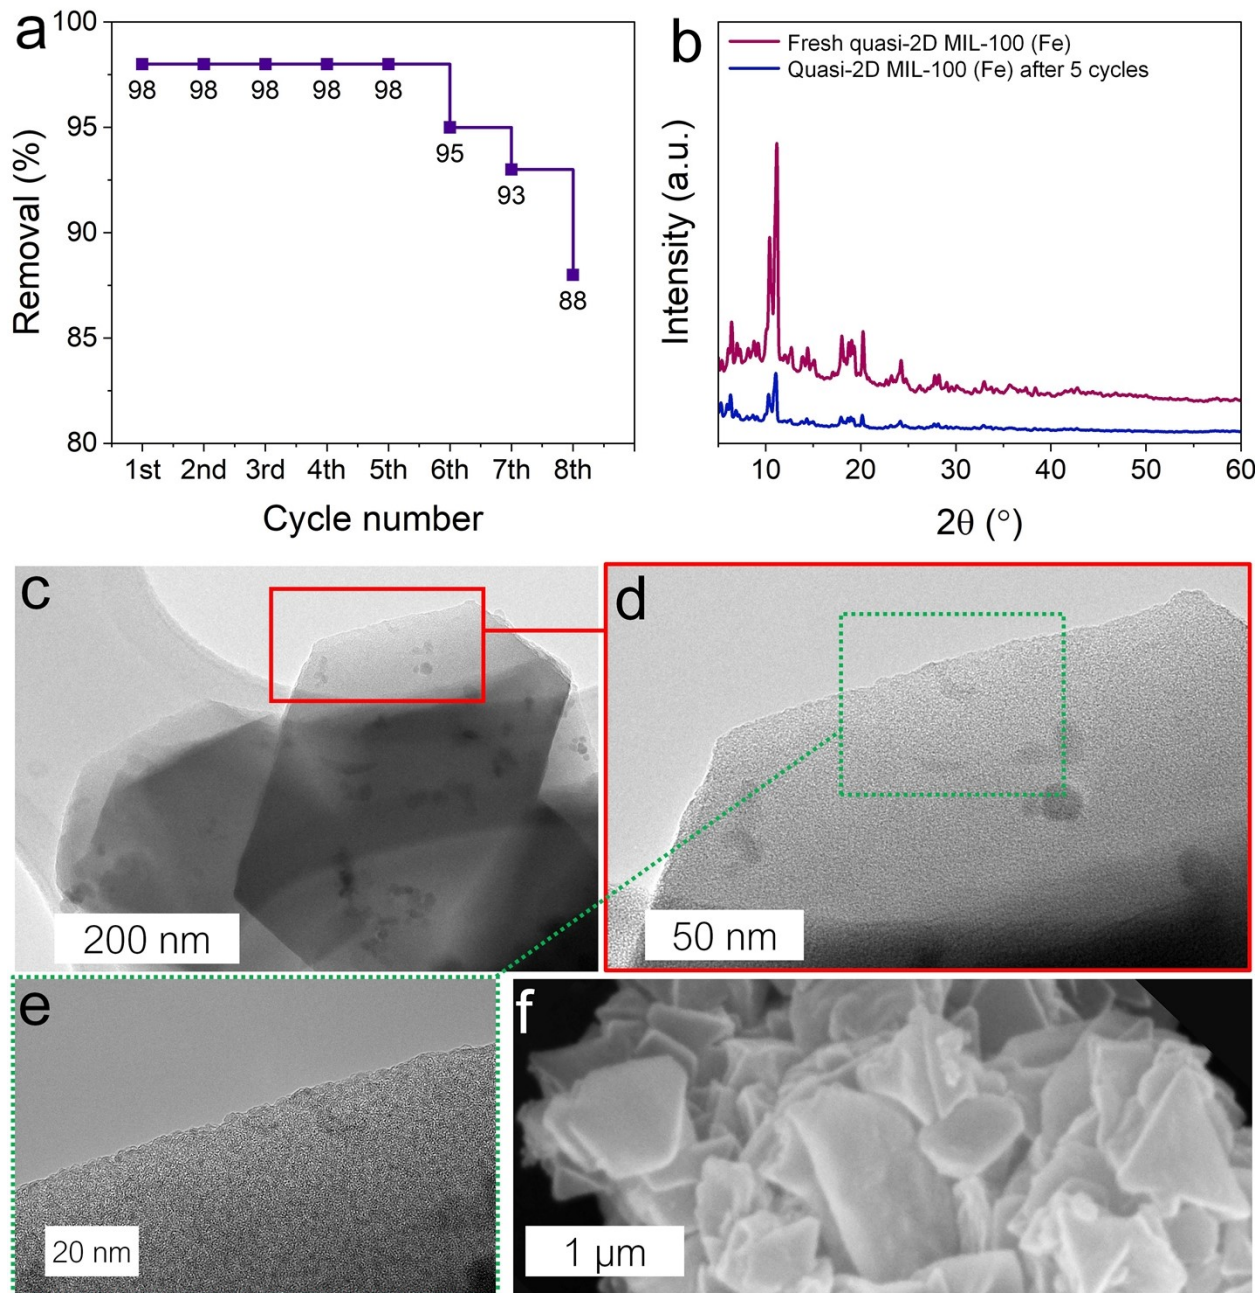

**Fig. S6.** Performance assessment and structural analysis of used adsorbent. (a) Reusability of the quasi-2D MIL-100 (Fe) up to 8 cycles. (b) the XRD pattern of the used quasi-2D MIL-100 (Fe) after multiple time reuse compared to the fresh adsorbent. (c-e) TEM micrograph of the used sample showing the Q2D structure and higher resolution images showing no significant signs of degradation, and (f) an SEM image of the use quasi-2D MIL-100 (Fe) with a Q2D morphology.

**Table S1.** Adsorption kinetic and isotherm data.

| <b>Kinetic parameters</b>   |                |                                     |                             |                |                                                        |
|-----------------------------|----------------|-------------------------------------|-----------------------------|----------------|--------------------------------------------------------|
| <b>Pseudo-first Model</b>   |                |                                     | <b>Pseudo-second Model</b>  |                |                                                        |
| $Q_e$ (mg g <sup>-1</sup> ) | R <sup>2</sup> | K <sub>1</sub> (min <sup>-1</sup> ) | $Q_e$ (mg g <sup>-1</sup> ) | R <sup>2</sup> | K <sub>2</sub> (g mg <sup>-1</sup> min <sup>-1</sup> ) |
| 27.8                        | 0.869          | 0.05                                | 30.3                        | 0.991          | 0.00364                                                |

  

| <b>Isotherm parameters</b>  |                |                         |                         |                |     |
|-----------------------------|----------------|-------------------------|-------------------------|----------------|-----|
| <b>Langmuir Model</b>       |                |                         | <b>Freundlich Model</b> |                |     |
| $Q_m$ (mg g <sup>-1</sup> ) | R <sup>2</sup> | B (L mg <sup>-1</sup> ) | K <sub>f</sub>          | R <sup>2</sup> | n   |
| 86.5                        | 0.994          | 1.7                     | 4.85                    | 0.952          | 4.2 |



**Table S2.** Removal of RhB organic dye by metal-organic frameworks

| Adsorbent                                                | Mass (mg) | Time (min) | pH   | T (°C) | Isotherm model | Adsorption capacity (Q, mg g <sup>-1</sup> ) | Kinetics model      | Ref.      |
|----------------------------------------------------------|-----------|------------|------|--------|----------------|----------------------------------------------|---------------------|-----------|
| Fe <sub>3</sub> O <sub>4</sub> /Conventional MIL-100(Fe) | 20        | 120        | 4-8  | RT     | Freundlich     | 28                                           | Pseudo-second order | 5         |
| Conventional MIL-100 (Fe)                                | 100       | 360        | 4-10 | RT     | Langmuir       | 61.9                                         | Elovich             | 6         |
| Nanoscale MIL-100 (Fe)                                   | 30        | Up to 30   | 6    | RT     | Langmuir       | 76                                           | Pseudo-second order | 7         |
| Conventional MIL-100 (Fe)                                | 25        | 400        | 6    | RT     | Langmuir       | 62                                           | Pseudo-second order | This work |
| Quasi-2D MIL-100 (Fe)                                    | 25        | 90         | 6    | RT     | Langmuir       | 86.5                                         | Pseudo-second order | This work |

## References

1. W. J. He, H. P. Jia, Z. P. Li, C. Q. Miao, R. H. Lu, S. B. Zhang and Z. Q. Zhang, *Journal of Environmental Chemical Engineering*, 2022, **10**, 108698.
2. T. T. He, W. Liu, T. Lev, M. S. Ma, Z. F. Liu, A. Vasiliev and X. G. Li, *Sensors and Actuators B: Chemical* 2021, **329**, 129275.
3. P. Horadada, S. Surble, C. Serre, D. Y. Hong, Y. K. Seo, J. S. Chang, J. M. Greneche, I. Margiolaki and G. Ferey, *Chem Commun (Camb)*, 2007, DOI: 10.1039/b704325b, 2820-2822.
4. C. F. Holder and R. E. Schaak, *ACS Nano*, 2019, **13**, 7359-7365.
5. H. Liu, X. Ren and L. Chen, *Journal of Industrial and Engineering Chemistry*, 2016, **34**, 278-285.
6. H. Y. Jang, J. K. Kang, J. A. Park, S. C. Lee and S. B. Kim, *Environ Pollut*, 2020, **267**, 115583.
7. S. Duan, J. Li, X. Liu, Y. Wang, S. Zeng, D. Shao and T. Hayat, *ACS Sustainable Chemistry & Engineering*, 2016, **4**, 3368–3378.
